# Supplementary material
Source: publisher figshare collection journal article supplement (https://acs.figshare.com/ndownloader/files/28971963)
Supplement: Supplementary file 1 [file 28971963]

# Supporting Information: Intercalation of Thin Film Gd-doped Ceria Barrier Layers in Electrolyte Supported Solid Oxide Cells: Physico-chemical Aspects

Matthias Riegraf,<sup>a</sup> Feng Han,<sup>a,\*</sup> Noriko Sata, Rémi Costa<sup>a</sup>

<sup>a</sup>German Aerospace Centre (DLR), Institute of Engineering Thermodynamics,

Pfaffenwaldring 38-40, 70569 Stuttgart, Germany

\*Corresponding author: E-mail: [feng.han@dlr.de](mailto:feng.han@dlr.de)

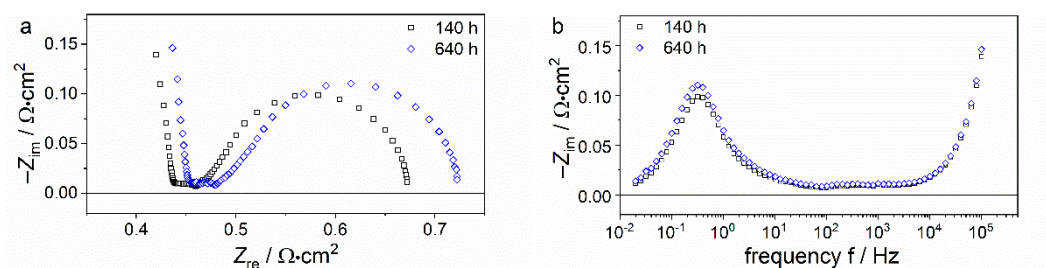

Figure S1. Nyquist and imaginary impedance plots at 140 h and 640 h of durability test 1 of the cell with 0.3  $\mu\text{m}$  thick barrier layer.

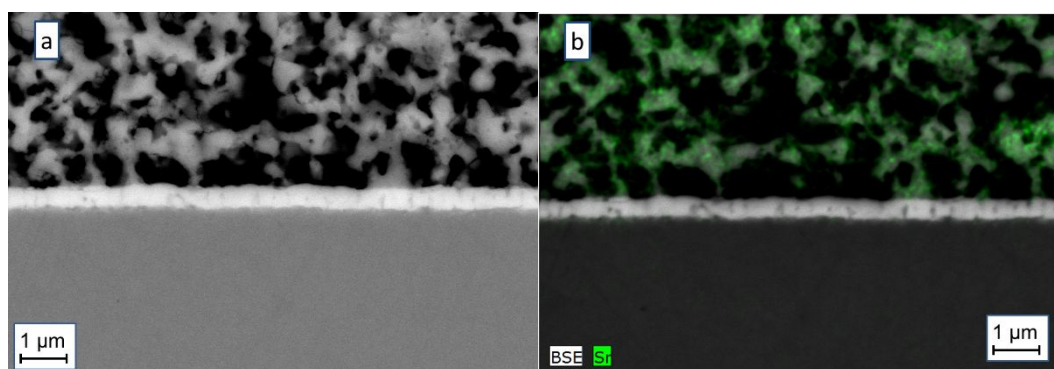

Figure S2. Post mortem a) SEM and b) EDX images of the LSCF/CGO/YSZ interface of the cell with 0.5  $\mu\text{m}$  thick CGO layers of the first durability test.

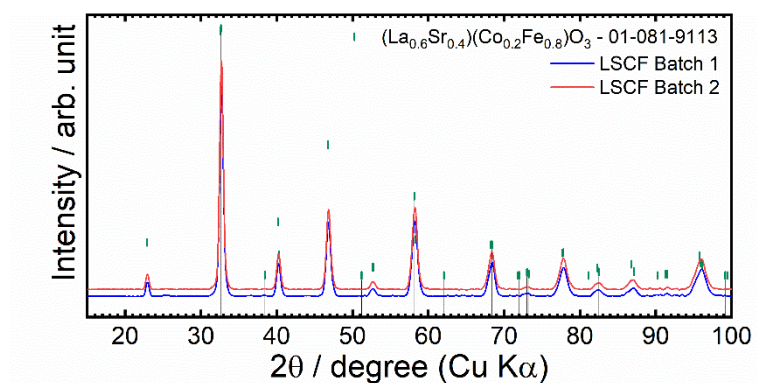

Figure S3. XRD patterns of the LSCF inks used in batch 1 and 2.

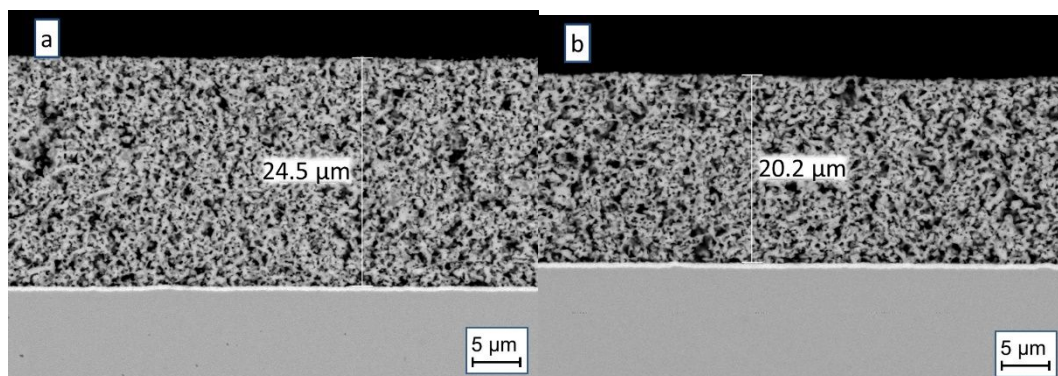

Figure S4. Post mortem SEM images of the LSCF/CGO/YSZ interface of the cells with 0.5  $\mu\text{m}$  thick CGO layers in a) batch 1 and b) batch 2.
